# Supplementary material
Source: PubMed Central journal article supplement (PMC9050819)
Supplement: NIHMS1776728-supplement-supinfo.pdf [file NIHMS1776728-supplement-supinfo.pdf]

**Supplementary Table 1** | Study cohort consisting of families including one to four affected individuals.

| # of individual exomed per family | Family ID   | # of Affecteds |
|-----------------------------------|-------------|----------------|
| 2 individuals                     | 1 and 13    | 3              |
|                                   | 17 and 19   | 3              |
|                                   | 3 and 21    | 2              |
|                                   | 4/22 and 23 | 2              |
|                                   | 26 and 27   | 2              |
|                                   | 7 and 35    | 4              |
|                                   | 8/37 and 39 | 3              |
|                                   | 40 and 41   | 3              |
|                                   | 43 and 44   | 4              |
|                                   | 47 and 48   | 4              |
|                                   | 10 and 54   | 2              |
| One individual                    | 25          | 2              |
|                                   | 28          | 2              |
|                                   | 32          | 2              |
|                                   | 52          | 2              |
|                                   | 56          | 2              |
|                                   | 59          | 1              |
|                                   | 60          | 1              |
|                                   | 61          | 1              |
|                                   | 62          | 1              |

**Supplementary Table 2** | WES Quality Metrics of 31 probands from 20 unrelated families.

| <b>METRIC</b>                     | <b>VALUE (AVERAGE)</b> |
|-----------------------------------|------------------------|
| <b>TOTAL_READS</b>                | 68,176,055             |
| <b>MEAN_TARGET_COVERAGE</b>       | 65.17                  |
| <b>PF_MISMATCH_RATE</b>           | 0.19%                  |
| <b>PF_HQ_ERROR_RATE</b>           | 0.17%                  |
| <b>PCT_USABLE_BASES_ON_TARGET</b> | 46.55%                 |
| <b>ZERO_CVG_TARGETS_PCT</b>       | 0.75%                  |
| <b>PCT_TARGET_BASES_10X</b>       | 93.14%                 |
| <b>PCT_TARGET_BASES_20X</b>       | 84.89%                 |
| <b>PCT_TARGET_BASES_30X</b>       | 74.74%                 |

**Supplementary Table 3 I** Candidate list of variants of unknown significance were identified in the study population by whole exome sequencing in FBN3

| Gene Symbol | Chr. | Pos.      | Ref_Allele | Alt_Allele | Zygosity | # of Family(ies) / Affecteds / Tested Individuals | Transcript_ID     | HGVS coding | HGVS Protein          | Location      | Mutation Type | dbSNP       | GME Variome AF       |
|-------------|------|-----------|------------|------------|----------|---------------------------------------------------|-------------------|-------------|-----------------------|---------------|---------------|-------------|----------------------|
| FBN3        | 19   | 8168562   | T          | C          | HET      | 1 / 2 / 1                                         | ENST00000600128.1 | c.4823A>G   | E1608G (p.Glu1608Gly) | exon 39 of 64 | Missense      | NA          | None                 |
|             | 19   | 8174231   | C          | T          | HET      | 1 / 2 / 2                                         | ENST00000600128.1 | c.4498G>A   | G1500R (p.Gly1500Arg) | exon 36 of 64 | Missense      | rs745616791 | 0.000503524672708962 |
| FN1         | 2    | 216283982 | G          | A          | HET      | 1 / 2 / 1                                         | ENST00000354785.4 | c.1802C>T   | P601L (p.Pro601Leu)   | exon 12 of 46 | Missense      | NA          | None                 |

and FN1 genes

| <b>GNOMAD<br/>(Total AF)</b> | <b>Revel</b>               | <b>VEST3</b>              |
|------------------------------|----------------------------|---------------------------|
| None                         | Damaging<br>(score:0.8939) | Damaging<br>(score:0.711) |
| 0.00002386                   | Damaging<br>(score:0.7319) | Damaging<br>(score:0.824) |
| None                         | Damaging<br>(score:0.431)  | Damaging<br>(score:0.91)  |

**Supplementary Table 4 |** First and second neighbours of FBN3 according to STRING database

|      | <b>First neighbours</b> | <b>Second neighbours</b> |
|------|-------------------------|--------------------------|
| FBN3 | MFAP5                   | FN1                      |
|      | MFAP2                   | TGFB1                    |
|      | FBN2                    | ITGA4                    |
|      | ITGA5                   | FLNA                     |
|      | ITGAV                   | SHC1                     |
|      | FURIN                   | ITGA2B                   |
|      | FBN1                    | ITGB8                    |
|      | ITGB3                   | ITGA6                    |
|      | ITGB6                   | ITGA8                    |
|      | ITGB1                   | ITGA3                    |

**Supplementary Table 5 I** Bioinformatic results for *FBN3* and *FN1* amino acid substitutions.

| Prediction       | FBN3:c.4823A>G:p.E1608G   | FBN3:c.4498G>A:p.G1500R   | FN1:c.1802C>T:p.P601L |
|------------------|---------------------------|---------------------------|-----------------------|
| PROVEAN          | Damaging (-6.09)          | Damaging (-5.68)          | Damaging (-3.88)      |
| SIFT             | Damaging (0)              | Damaging (0.003)          | Damaging (0.001)      |
| Polyphen2_HDIV   | Probably_damaging (0.988) | Probably_damaging (1)     | Probably_damaging (1) |
| Polyphen2_HVAR   | Possibly_damaging (0.815) | Probably_damaging (0.998) | Probably_damaging (1) |
| CADD             | Damaging (24.6)           | Damaging (29)             | Damaging (34)         |
| LRT              | Unknown                   | Unknown                   | Deleterious           |
| MetaSVM          | Damaging (1.084)          | Damaging (0.881)          | Tolerable (-1.051)    |
| MetaLR           | Damaging (0.971)          | Damaging (0.879)          | Tolerable (0.152)     |
| MutationAssessor | Medium (2.52)             | Medium (3.255)            | Low (1.935)           |
| VEST3            | Damaging (0.711)          | Damaging (0.824)          | Damaging (0.91)       |
| MutationTaster   | Disease_causing (1)       | Disease_causing (1)       | Disease_causing (1)   |
| REVEL            | Damaging (0.894)          | Damaging (0.732)          | Damaging (0.431)      |
| GERP score       | Conserved (3.61)          | Conserved (4.12)          | Conserved (6.06)      |
| PhastCons        | Conserved (1)             | Conserved (1)             | Conserved (1)         |
| PhyloP           | Conserved (7.398)         | Conserved (7.357)         | Conserved (10.003)    |
| FATHMM           | Damaging (-5.18)          | Damaging (-3.16)          | Tolerable (1.92)      |
| FATHMM_MKL       | Damaging (0.966)          | Damaging (0.991)          | Damaging (0.981)      |
| DANN             | Damaging (0.999)          | Damaging (0.999)          | Damaging (0.999)      |
| Eigen            | Damaging (0.234)          | Damaging (0.476)          | Damaging (0.883)      |

PROVEAN prediction (score)1)

SIFT prediction (score)2)

PolyPhen-2 prediction (score)3)

CADD prediction (phred-like score)4)

LRT prediction (LRTnew score)5)

MetaSVM and MetaLR prediction (score)6)

MutationAssessor prediction (score)7)

VEST3 score)8)

MutationTaster2 prediction (score)9)  
REVEL prediction (score)10)  
GERP++ score11)  
PhastCons100way score12)  
PhyloP100way score12)  
FATHMM and FATHMM\_MKL score 13)  
DANN score14)  
Eigen score15)

- 1)PROVEAN (Choi et al., 2012) scores equal or below -2.50 are considered “deleterious”.
- 2)SIFT (Kumar et al., 2009) scores  $\leq 0.05$  are assigned the prediction “damaging”.
- 3)PolyPhen-2 (Adzhubei et al., 2010) scores near 1 are most strongly predicting a “damaging” effect of an amino substitution.
- 4)CADD (Kircher et al., 2014) phred-like rank scores above 15 (for a more conservative estimate: above 20) are considered “damaging”.
- 5)Values for the LRTnew (Chun & Fay, 2009) score range from 0 to 1 with higher values indicating a variant is more likely to be “deleterious”.
- 6)MetaSVM and MetaLR (Dong et al., 2015) scores range from 0 to 1 with higher values indicating a variant is more likely to be “deleterious”.
- 7)MutationAssessor (Reva et al., 2011) scores range from -5.14 to 6.49 with higher scores indicating increasing likelihood of functional impact of a variant. Score c
- 8)VEST3 (Carter et al., 2013) score ranges from 0 to 1. The larger the score the more likely the variant may cause functional change.
- 9)The probability value given by MutationTaster2 (Schwarz et al., 2010) is the probability of the prediction, i.e. a value close to 1 indicates a high “security” of the
- 10)REVEL(Shihab et al., 2014) classifier outputs a prediction score between 0 and 1; mutations scoring from 0 to 0.5 are classified as “likely benign”, and those scc
- 11)GERP++ (Davydov et al., 2010) estimates evolutionary constraint of specific positions in 36 mammalian species. Scores range from -12.36 to 6.18 with higher s
- 12)PhastCons and PhyloP (Pollard et al., 2010) conservation scores are based on multiple alignments of 100 vertebrate genomes. Scores range from 0 to 1 for Pha
- 13)FATHMM and FATHMM\_MKL score (Shihab et al. 2013) scores range from 0 to 1 with higher values indicating a variant is more likely to be “deleterious”.
- 14)DANN score (Quang et al. 2015) score range from 0 to 1 with higher values indicating a variant is more likely to be “deleterious”.
- 15)Eigen score (Ionita-Laza et al. 2016)





stCons and from -20 to 9.87 for PhyloP with higher scores suggesting stronger conservation of the site.

**Supplementary Table 6 I** Clinical and laboratory features of patients with variants of unknown significance in *FBN3* and *FN1* genes.

| Family_Number                                     | Family_3                  |                 | Family_10                    | Family_16                |
|---------------------------------------------------|---------------------------|-----------------|------------------------------|--------------------------|
| Patient ID                                        | 22                        | 23              | 28                           | 56                       |
| Reported Consanguinity                            | daughter of 23            | mother of 22    | daughter of 30, sister of 29 | sister of 55             |
| # of Affecteds                                    | 2 (1 mother 1 daughter)   |                 | 2 (1 mother 1 daughter)      | 2 sisters                |
| Oligomenorrhea / Amenorrhea                       | NO                        | NO              | NO                           | NO                       |
| Polycystic ovary                                  | YES                       | history of PCOS | YES                          | YES                      |
| Hyperandrogenemia                                 | YES                       | YES             | YES                          | YES                      |
| Infertility                                       | YES                       | NO              | NO                           | NO                       |
| Age (years)                                       | 23                        | 51              | 26                           | 25                       |
| Body mass index (kg/m <sup>2</sup> )              | 29,8                      | 34,1            | 23,4                         | 20                       |
| Waist circumference (cm)                          | 95                        | 101             | 86                           | 63                       |
| Hip circumference (cm)                            | 114                       | 119             | 98                           | 86                       |
| Ferriman-Gallwey scale                            | 18                        | 8               | 8                            | 9                        |
| Anti mullerian hormone (ng/mL; 0,07-7,35)         | 2,4                       | 0,2             | 4,1                          | 1,5                      |
| Dehydroepiandrosterone sulfate (µg/dL; 23-266)    | 273,2                     | 186,4           | 190,8                        | 182,4                    |
| Total Testosterone (ng/L; 0.15-0.7)               | 0,55                      | 0,28            | 0,38                         | 0,5                      |
| Androstenedione (ng/dL; 0,3-3,3)                  | 5,91                      | 4,45            | 5,7                          | 6,17                     |
| Sex hormone-binding globulin (nmol/L; 18-144)     | 34,02                     | 33,36           | 21,45                        | 153,05                   |
| Triglyceride (mg/dL; <150)                        | 122                       | 162             | 70                           | 62                       |
| Cholesterol (mg/dL; <200)                         | 200                       | 221             | 182                          | 159                      |
| High-density lipoprotein cholesterol (mg/dL; >50) | 50                        | 43              | 64                           | 55                       |
| Low-density lipoprotein cholesterol (mg/dL; <130) | 126                       | 145             | 104                          | 91                       |
| Fasting blood insulin level (mIU/L)               | 5,45                      | 5,02            | 4,87                         | 3,83                     |
| Fasting glucose(mmol/L )                          | 92                        | 78              | 76                           | 86                       |
| Gene                                              | <i>FBN3</i> (NM_032447.5) |                 | <i>FBN3</i> (NM_032447.5)    | <i>FN1</i> (NM_212482.4) |
| Variant                                           | c.4498G>A, p.Gly1500Arg   |                 | c.4823A>G, p.Glu1608Gly      | c.1802C>T; p.Pro601Leu   |

**Supplementary Table 7 I** Fibronectin related 3 known interactions (drugs) according to QuartataWeb Server and DrugBank Database.

| No. | Group                     | Type              | Drug ID | Drug Name   |
|-----|---------------------------|-------------------|---------|-------------|
| 1   | Approved; Investigational | SmallMoleculeDrug | DB01593 | Zinc        |
| 2   | Investigational           | BiotechDrug       | DB06245 | Lanoteplase |
| 3   | Approved                  | BiotechDrug       | DB08888 | Ocriplasmin |

The DrugBank database identifies 3 drugs for this target protein:

|               |                                     |
|---------------|-------------------------------------|
| Generic name: | DB11348 calcium phosphate           |
| Generic name: | DB11093 calcium citrate             |
| Generic name: | DB14481 calcium phosphate dihydrate |

**Supplementary Table 8 I** Enrichment analysis of 1827 variant-carrying genes that were identified in multiple families

| source | term_name                                                               | term ID       | adjusted p-value |
|--------|-------------------------------------------------------------------------|---------------|------------------|
| GO:CC  | supramolecular polymer                                                  | GO:0099081    | 1.67E-14         |
| GO:MF  | extracellular matrix structural constituent                             | GO:0005201    | 5.78E-14         |
| GO:CC  | supramolecular fiber                                                    | GO:0099512    | 8.82E-14         |
| GO:CC  | supramolecular complex                                                  | GO:0099080    | 1.88E-12         |
| GO:BP  | biological adhesion                                                     | GO:0022610    | 2.17E-11         |
| GO:BP  | cell adhesion                                                           | GO:0007155    | 2.53E-11         |
| GO:CC  | basement membrane                                                       | GO:0005604    | 2.57E-11         |
| GO:MF  | dynein light intermediate chain binding                                 | GO:0051959    | 1.47E-09         |
| GO:CC  | cell periphery                                                          | GO:0071944    | 1.65E-09         |
| GO:CC  | plasma membrane                                                         | GO:0005886    | 2.25E-09         |
| GO:MF  | structural molecule activity                                            | GO:0005198    | 2.33E-09         |
| REAC   | Collagen chain trimerization                                            | REAC:R-HSA-89 | 6.92E-09         |
| GO:MF  | extracellular matrix structural constituent conferring tensile strength | GO:0030020    | 1.13E-08         |
| GO:CC  | polymeric cytoskeletal fiber                                            | GO:0099513    | 1.18E-08         |
| GO:CC  | cytoskeleton                                                            | GO:0005856    | 1.43E-08         |
| GO:MF  | motor activity                                                          | GO:0003774    | 1.58E-08         |
| GO:CC  | extracellular matrix                                                    | GO:0031012    | 1.60E-08         |
| REAC   | ECM proteoglycans                                                       | REAC:R-HSA-30 | 2.82E-08         |
| KEGG   | ECM-receptor interaction                                                | KEGG:04512    | 3.19E-08         |
| GO:CC  | collagen-containing extracellular matrix                                | GO:0062023    | 7.97E-08         |
| REAC   | Extracellular matrix organization                                       | REAC:R-HSA-14 | 8.36E-08         |
| GO:MF  | ATP-dependent microtubule motor activity, minus-end-directed            | GO:0008569    | 1.28E-07         |
| REAC   | Assembly of collagen fibrils and other multimeric structures            | REAC:R-HSA-20 | 1.77E-07         |
| GO:MF  | calcium ion binding                                                     | GO:0005509    | 1.81E-07         |
| REAC   | Degradation of the extracellular matrix                                 | REAC:R-HSA-14 | 2.54E-07         |
| KEGG   | Protein digestion and absorption                                        | KEGG:04974    | 3.83E-07         |
| GO:MF  | microtubule motor activity                                              | GO:0003777    | 3.86E-07         |
| GO:MF  | ATP-dependent microtubule motor activity                                | GO:1990939    | 4.07E-07         |
| REAC   | Non-integrin membrane-ECM interactions                                  | REAC:R-HSA-30 | 5.46E-07         |
| GO:CC  | intermediate filament                                                   | GO:0005882    | 2.04223E-06      |
| GO:BP  | multicellular organismal process                                        | GO:0032501    | 4.41621E-06      |
| GO:CC  | keratin filament                                                        | GO:0045095    | 7.17465E-06      |
| REAC   | Collagen formation                                                      | REAC:R-HSA-14 | 1.04754E-05      |
| REAC   | Collagen biosynthesis and modifying enzymes                             | REAC:R-HSA-16 | 1.23034E-05      |
| GO:CC  | intermediate filament cytoskeleton                                      | GO:0045111    | 1.40041E-05      |
| GO:MF  | dynein intermediate chain binding                                       | GO:0045505    | 2.54831E-05      |
| GO:MF  | ATP binding                                                             | GO:0005524    | 4.48364E-05      |
| GO:MF  | adenyl ribonucleotide binding                                           | GO:0032559    | 7.12763E-05      |
| GO:BP  | homophilic cell adhesion via plasma membrane adhesion molecules         | GO:0007156    | 7.75815E-05      |
| GO:CC  | collagen trimer                                                         | GO:0005581    | 7.86649E-05      |
| GO:CC  | Z disc                                                                  | GO:0030018    | 9.88667E-05      |
| REAC   | NCAM1 interactions                                                      | REAC:R-HSA-42 | 9.91098E-05      |
| GO:MF  | ATPase activity                                                         | GO:0016887    | 0.000101732      |
| GO:MF  | adenyl nucleotide binding                                               | GO:0030554    | 0.000112851      |
| GO:CC  | dynein complex                                                          | GO:0030286    | 0.000114771      |

|       |                                                           |               |             |
|-------|-----------------------------------------------------------|---------------|-------------|
| GO:BP | multicellular organism development                        | GO:0007275    | 0.000125118 |
| REAC  | Collagen degradation                                      | REAC:R-HSA-14 | 0.000134526 |
| GO:CC | plasma membrane region                                    | GO:0098590    | 0.0001653   |
| GO:BP | skin development                                          | GO:0043588    | 0.000166819 |
| GO:BP | system development                                        | GO:0048731    | 0.000213147 |
| GO:BP | developmental process                                     | GO:0032502    | 0.000234359 |
| GO:CC | I band                                                    | GO:0031674    | 0.000236068 |
| REAC  | MET activates PTK2 signaling                              | REAC:R-HSA-88 | 0.000242775 |
| REAC  | Laminin interactions                                      | REAC:R-HSA-30 | 0.000242775 |
| REAC  | Keratinization                                            | REAC:R-HSA-68 | 0.000243058 |
| REAC  | Integrin cell surface interactions                        | REAC:R-HSA-2  | 0.000250707 |
| GO:BP | anatomical structure development                          | GO:0048856    | 0.0002636   |
| GO:BP | cytoskeleton organization                                 | GO:0007010    | 0.000306618 |
| GO:BP | keratinization                                            | GO:0031424    | 0.000448565 |
| REAC  | NCAM signaling for neurite out-growth                     | REAC:R-HSA-37 | 0.000793503 |
| GO:BP | cell-cell adhesion via plasma-membrane adhesion molecules | GO:0098742    | 0.000831677 |
| GO:CC | complex of collagen trimers                               | GO:0098644    | 0.000989418 |
| GO:CC | membrane                                                  | GO:0016020    | 0.001091294 |
| GO:CC | myofibril                                                 | GO:0030016    | 0.001451939 |
| GO:BP | cell-cell adhesion                                        | GO:0098609    | 0.00146937  |
| GO:CC | cell projection                                           | GO:0042995    | 0.001598052 |
| GO:CC | contractile fiber                                         | GO:0043292    | 0.001804352 |
| GO:BP | extracellular matrix organization                         | GO:0030198    | 0.001895027 |
| REAC  | MET promotes cell motility                                | REAC:R-HSA-88 | 0.001904787 |
| GO:BP | extracellular structure organization                      | GO:0043062    | 0.002072227 |
| GO:MF | cytoskeletal protein binding                              | GO:0008092    | 0.002520355 |
| GO:CC | apical plasma membrane                                    | GO:0016324    | 0.003301769 |
| GO:CC | cornified envelope                                        | GO:0001533    | 0.003392847 |
| GO:CC | microtubule cytoskeleton                                  | GO:0015630    | 0.004075773 |
| GO:MF | ion binding                                               | GO:0043167    | 0.004180248 |
| GO:MF | protein-containing complex binding                        | GO:0044877    | 0.004224419 |
| GO:CC | sarcomere                                                 | GO:0030017    | 0.0044201   |
| GO:BP | epidermis development                                     | GO:0008544    | 0.004675443 |
| GO:CC | non-membrane-bounded organelle                            | GO:0043228    | 0.005087849 |
| GO:MF | structural constituent of nuclear pore                    | GO:0017056    | 0.005762247 |
| GO:CC | laminin complex                                           | GO:0043256    | 0.006041182 |
| GO:BP | animal organ development                                  | GO:0048513    | 0.006315637 |
| GO:CC | microtubule associated complex                            | GO:0005875    | 0.006419787 |
| GO:BP | microtubule-based process                                 | GO:0007017    | 0.006782062 |
| GO:BP | movement of cell or subcellular component                 | GO:0006928    | 0.007710079 |
| GO:CC | axonemal dynein complex                                   | GO:0005858    | 0.00912463  |
| GO:CC | endoplasmic reticulum lumen                               | GO:0005788    | 0.009191476 |
| GO:BP | keratinocyte differentiation                              | GO:0030216    | 0.009282275 |
| GO:MF | actin binding                                             | GO:0003779    | 0.00943882  |
| GO:CC | intracellular non-membrane-bounded organelle              | GO:0043232    | 0.00960729  |
| CORUM | Fanconi anemia FAAP100 complex                            | CORUM:6884    | 0.012080286 |
| GO:BP | microtubule-based movement                                | GO:0007018    | 0.01210945  |
| GO:CC | cell surface                                              | GO:0009986    | 0.012490275 |
| GO:BP | epidermal cell differentiation                            | GO:0009913    | 0.01264555  |
| GO:CC | apical part of cell                                       | GO:0045177    | 0.015539784 |
| TF    | Factor: SREBP-1; motif: CACSCCA                           | TF:M00749     | 0.016090643 |

|       |                                                        |             |             |
|-------|--------------------------------------------------------|-------------|-------------|
| GO:BP | cellular component organization                        | GO:0016043  | 0.018508118 |
| GO:CC | inner dynein arm                                       | GO:0036156  | 0.01851598  |
| TF    | Factor: ZNF692; motif: SYNGGSCCCASCCNC; match class: 1 | TF:M09734_1 | 0.020175167 |
| GO:MF | actinin binding                                        | GO:0042805  | 0.021935067 |
| GO:CC | microtubule                                            | GO:0005874  | 0.025113843 |
| GO:BP | cellular component organization or biogenesis          | GO:0071840  | 0.027179913 |
| KEGG  | Amoebiasis                                             | KEGG:05146  | 0.028318445 |
| KEGG  | Focal adhesion                                         | KEGG:04510  | 0.033604016 |
| GO:MF | carbohydrate derivative binding                        | GO:0097367  | 0.03850305  |
| GO:MF | alpha-actinin binding                                  | GO:0051393  | 0.038617668 |
| CORUM | FA complex (Fanconi anemia complex)                    | CORUM:1152  | 0.041061481 |

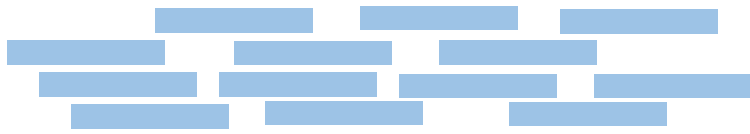

DNA reads

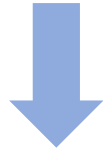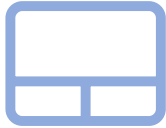

Next Generation Sequencing

Illumina HiSeq 2000

Illumina Casava 1.8

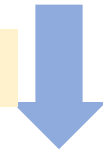

```
ATCAGC  CGTCCGC  GCAACG
AAAAGT  GCGAATTAA  AGGC
```

FASTQ file

BWA Aligner

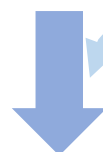

Reference Human Genome

```
ATCCGCAACGTCCGCGAAATTAATTC
ATCAGC  CGTCCGC  AAAAGG
GCAACG  GCGAATTAA  AGGC
```

Alignment

GATK Genome Analysis Toolkit

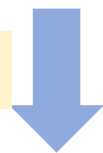

```
ATCCGCAACGTCCGCGAAATTAATTC
ATCAGC  CGTCCGC  AAAAGG
GCAACG  GCGAATTAA  AGGC
```

SNVs / InDel calling

Ensembl-VEP - Variant Effect Predictor

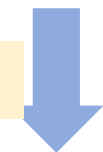

Variant Annotation and  
Prioritization

Disease associated  
novel variants
